# Supplementary material
Source: publisher site journal article supplement (https://www.dovepress.com/article/331907)
Supplement: Supplementary file 1 [file get_supplementary_file.php]

**Supplemental Table 1** Patient Characteristics in risk factor clusters identified by performing latent class analysis of patients who died from COVID-19 during hospitalization

| **Characteristics** | **All** | **C1'** | **C2'** | **P value** |
| --- | --- | --- | --- | --- |
|  | **N=75** | **n=52** | **n=23** |  |
| Risk factors |  |  |  |  |
| Age, years | 74.7 ± 16.7 | 83.4 ± 9.0 | 54.9 ± 12.7 | <0.001 |
| Age ≥65 years | 54 (72.0%) | 51 (98.1%) | 3 (13.0%) | <0.001 |
| Male | 50 (66.7%) | 30 (57.7%) | 20 (87.0%) | 0.02 |
| Nonwhite | 22 (29.3%) | 8 (15.4%) | 14 (60.9%) | <0.001 |
| BMI | 28.0 ± 7.0 | 26.8 ± 6.29 | 30.9 ± 7.8 | 0.03 |
| BMI ≥30 kg/m2 | 26 (34.7%) | 13 (25.0%) | 13 (56.5%) | 0.02 |
| CAD | 20 (26.7%) | 20 (38.5%) | 0 (0.0%) | <0.001 |
| HTN | 51 (68.0%) | 42 (80.8%) | 9 (39.1%) | 0.001 |
| CHF | 12 (16.0%) | 12 (23.1%) | 0 (0.0%) | 0.01 |
| DM | 24 (32.0%) | 17 (32.7%) | 7 (30.4%) | 1 |
| CKD | 14 (18.7%) | 12 (23.1%) | 2 (8.7%) | 0.20 |
| Neurological disease | 22 (29.3%) | 19 (36.5%) | 3 (13.0%) | 0.05 |
| Gastrointestinal disease | 21 (28.0%) | 18 (34.6%) | 3 (13.0%) | 0.09 |
| Pre-existing respiratory | 17 (22.7%) | 17 (32.7%) | 0 (0.0%) | <0.001 |
| Treatments |  |  |  |  |
| Tocilizumab | 30 (40.0%) | 14 (26.9%) | 16 (69.6%) | 0.001 |
| Protease inhibitors | 25 (33.3%) | 12 (23.1%) | 13 (56.5%) | 0.01 |
| Convalescent plasma | 3 (4.0%) | 0 (0.0%) | 3 (13.0%) | 0.03 |
| Remdesivir | 5 (6.67%) | 0 (0.0%) | 5 (21.7%) | 0.002 |
| Anticoagulation | 39 (52.0%) | 22 (42.3%) | 17 (73.9%) | 0.02 |
| Hemodialysis | 9 (12.0%) | 3 (5.8%) | 6 (26.1%) | 0.02 |
| Intubation | 35 (46.7%) | 16 (30.8%) | 19 (82.6%) | <0.001 |
| Oxygen (FiO2) | 0.60 ± 0.31 | 0.65 ± 0.29 | 0.49 ± 0.35 | 0.06 |
| Laboratory Data |  |  |  |  |
| Creatinine, mg/dL | 2.53 ± 2.06 | 2.29 ± 1.81 | 3.06 ± 2.49 | 0.19 |
| Troponin, ng/mL | 2.77 ± 12.70 | 1.67 ± 5.08 | 5.25 ± 21.80 | 0.44 |
| Pro-BNP, pg/mL | 6817 ± 8056 | 7518 ± 9173 | 5493 ± 5340 | 0.32 |
| Ferritin, ng/mL | 3902 ± 9650 | 2474 ± 6033 | 7099 ± 14584 | 0.18 |
| CRP, mg/L | 35.2 ± 73.5 | 12.6 ± 10.8 | 84.4 ± 117.0 | 0.008 |
| D-dimer, mg/L | 11.6 ± 12.2 | 8.5 ± 10.3 | 17.8 ± 13.6 | 0.007 |
| ALT, U/L | 311 ± 914 | 137 ± 276 | 695 ± 1542 | 0.10 |
| AST, U/L | 572 ± 1694 | 267 ± 806 | 1247 ± 2711 | 0.10 |
| Outcomes |  |  |  |  |
| Length of stay, days | 11.3 ± 10.1 | 7.8 ± 5.1 | 19.3 ± 13.6 | 0.001 |
| Death | 75 (100%) | 52 (100%) | 23 (100%) | <0.001 |

**Notes:** Data are presented as the mean ± standard deviation or as the number (%).

**Abbreviations:** ALT, alanine transaminase; AST, aspartate aminotransferase; BMI, body mass index; CAD, coronary artery disease; CHF, chronic heart failure; CKD, chronic kidney disease; CRP, C-reactive protein; DM, diabetes mellitus, HTN, hypertension; pro-BNP, pro–B-type natriuretic peptide.
